# Supplementary material for: Malagasy Conostigmus (Hymenoptera: Ceraphronoidea) and the secret of scutes
Source: PeerJ journal article supplement (doi:10.7717/peerj.2682), 2016-12-13

Figure S1. Relationship between median cell length and number of cells as box-splot. Cell length is the longest diameter of scutes. Number of cells refers to the number of scutes/cells of a standard sized rectangular area.

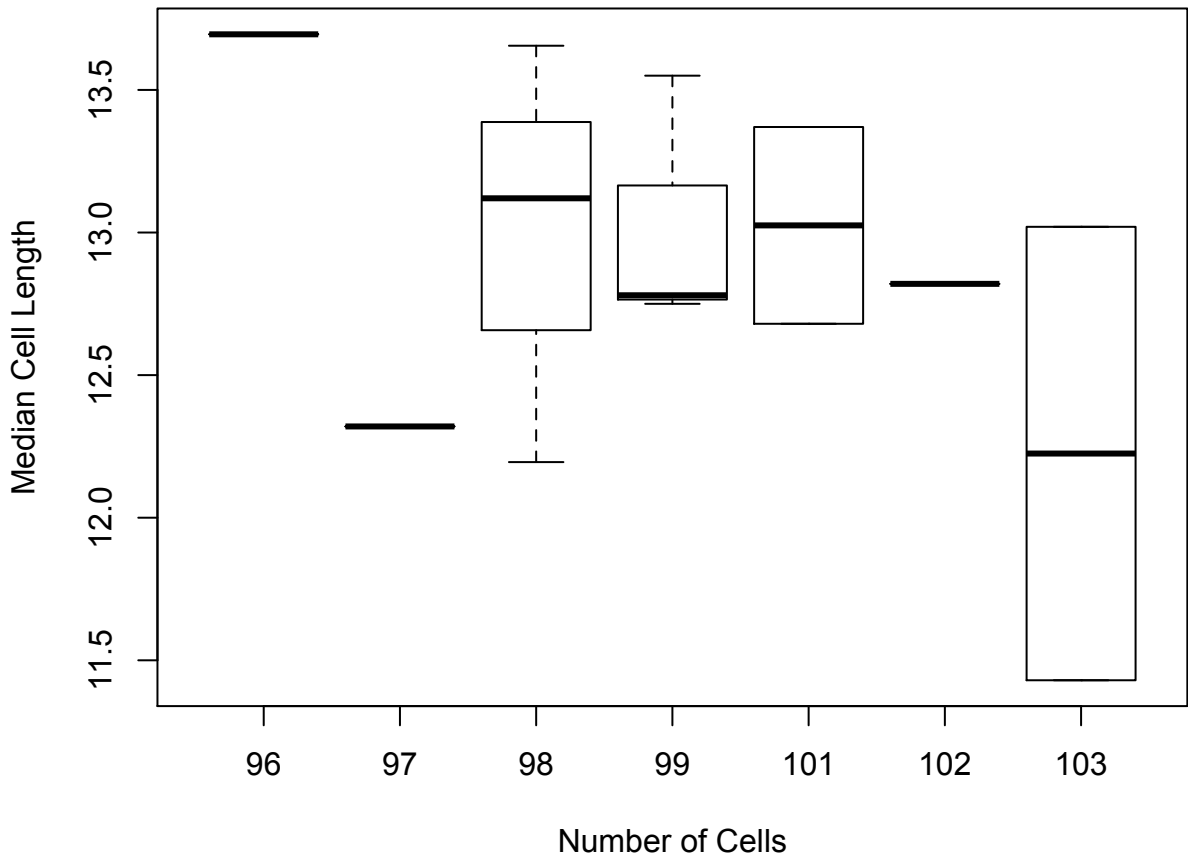

Supplement: Figure_S1.pdf [file Figure_S1.pdf]
