# Supplementary material for: Malagasy Conostigmus (Hymenoptera: Ceraphronoidea) and the secret of scutes
Source: PeerJ journal article supplement (doi:10.7717/peerj.2682), 2016-12-13

Figure S4. Relationship between body size and median cell length as linear regression. Interorbital space length (IOS), measured in  $\mu\text{m}$ , stands as a proxy for body size. Number of cells refers to the number of scutes/cells of a standard sized rectangular area.

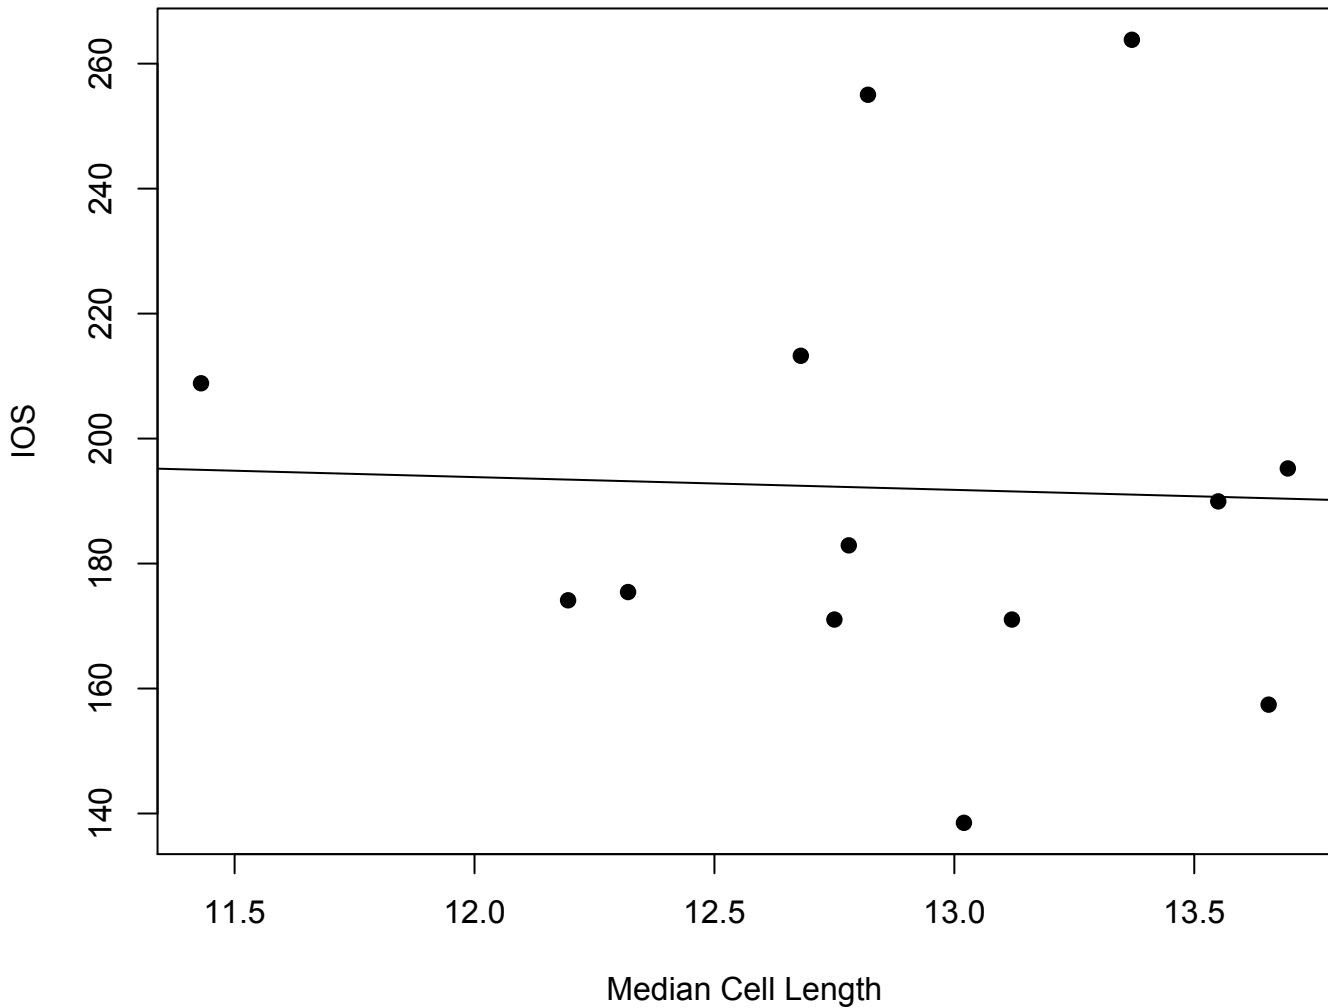

Supplement: Figure_S4.pdf [file Figure_S4.pdf]
