# Supplementary material for: Malagasy Conostigmus (Hymenoptera: Ceraphronoidea) and the secret of scutes
Source: PeerJ journal article supplement (doi:10.7717/peerj.2682), 2016-12-13
Supplement: Table_S3.pdf [file Table_S3.pdf]

| <b>Table S3:</b> URI table (Seltmann et al. 2013) containing anatomical terms, definitions and uniform resource identifiers of Hymenoptera specific classes in the Hymenoptera Anatomy Ontology and abbreviations ( <a href="http://hymao.org">http://hymao.org</a> ). |                                         |                                                                                                                                                     |                                                                                                     |
|------------------------------------------------------------------------------------------------------------------------------------------------------------------------------------------------------------------------------------------------------------------------|-----------------------------------------|-----------------------------------------------------------------------------------------------------------------------------------------------------|-----------------------------------------------------------------------------------------------------|
| <b>Abbreviation</b>                                                                                                                                                                                                                                                    | <b>Term</b>                             | <b>Concept</b>                                                                                                                                      | <b>URI</b>                                                                                          |
|                                                                                                                                                                                                                                                                        | Metanoto-propodeo-metapecto-mesop       | The sclerite that is connected anterolaterally and anteroventrally with the pronotum and anterodorsally with the mesoscutellum and the mesop        | <a href="http://purl.obolibrary.org/obo/HAO_0001921">http://purl.obolibrary.org/obo/HAO_0001921</a> |
|                                                                                                                                                                                                                                                                        | S9                                      | The sternite that is connected posteriorly to the cupula via muscles.                                                                               | <a href="http://purl.obolibrary.org/obo/HAO_0002053">http://purl.obolibrary.org/obo/HAO_0002053</a> |
|                                                                                                                                                                                                                                                                        | abdominal tergum                        | The tergum that is located in the abdomen.                                                                                                          | <a href="http://purl.obolibrary.org/obo/HAO_0001426">http://purl.obolibrary.org/obo/HAO_0001426</a> |
|                                                                                                                                                                                                                                                                        | anatomical line                         | Non-material anatomical entity of one dimension, which forms a boundary of an anatomical surface or is a modulation of an anatomical surface        | <a href="http://purl.obolibrary.org/obo/HAO_0000008">http://purl.obolibrary.org/obo/HAO_0000008</a> |
|                                                                                                                                                                                                                                                                        | antecostal sulcus                       | The sulcus that corresponds to the antecosta.                                                                                                       | <a href="http://purl.obolibrary.org/obo/HAO_0000099">http://purl.obolibrary.org/obo/HAO_0000099</a> |
|                                                                                                                                                                                                                                                                        | antecostal sulcus of the first abdomina | The sulcus that corresponds to the metaphragma.                                                                                                     | <a href="http://purl.obolibrary.org/obo/HAO_0001853">http://purl.obolibrary.org/obo/HAO_0001853</a> |
|                                                                                                                                                                                                                                                                        | antenna                                 | The appendage that is composed of ringlike sclerites and the anatomical structures encircled by these sclerites and that is articulated with the cr | <a href="http://purl.obolibrary.org/obo/HAO_0000101">http://purl.obolibrary.org/obo/HAO_0000101</a> |
|                                                                                                                                                                                                                                                                        | antennal rim                            | The rim that surrounds the antennal foramen.                                                                                                        | <a href="http://purl.obolibrary.org/obo/HAO_0000103">http://purl.obolibrary.org/obo/HAO_0000103</a> |
| asr                                                                                                                                                                                                                                                                    | antennal scrobe                         | The scrobe that is located dorsally of the antennal foramen and is for the reception of the antenna.                                                | <a href="http://purl.obolibrary.org/obo/HAO_0001432">http://purl.obolibrary.org/obo/HAO_0001432</a> |
|                                                                                                                                                                                                                                                                        | anterior discriminal pit                | The pit at the anteriormost point of the mesodiscrimen.                                                                                             | <a href="http://purl.obolibrary.org/obo/HAO_0002393">http://purl.obolibrary.org/obo/HAO_0002393</a> |
|                                                                                                                                                                                                                                                                        | anterior mesopleuro-mesofurcal musc     | The mesofurcal muscle that originates from the mesopleuron and inserts distally on the mesofurca.                                                   | <a href="http://purl.obolibrary.org/obo/HAO_0000118">http://purl.obolibrary.org/obo/HAO_0000118</a> |
| app                                                                                                                                                                                                                                                                    | anteromedian projection of the metan    | The median projection on the anterior region of the metanoto-propodeo-metapecto-mesopectal complex.                                                 | <a href="http://purl.obolibrary.org/obo/HAO_0002397">http://purl.obolibrary.org/obo/HAO_0002397</a> |
| aps                                                                                                                                                                                                                                                                    | apical parossicular seta                | The seta that is located close to the distoventral margin of the gonostyle/volsella complex just laterally of the gonostyle/volsella complex-gonos  | <a href="http://purl.obolibrary.org/obo/HAO_0000138">http://purl.obolibrary.org/obo/HAO_0000138</a> |
|                                                                                                                                                                                                                                                                        | apodeme                                 | The process that is internal.                                                                                                                       | <a href="http://purl.obolibrary.org/obo/HAO_0000142">http://purl.obolibrary.org/obo/HAO_0000142</a> |
|                                                                                                                                                                                                                                                                        | area                                    | The anatomical structure of the cuticle that is delimited by material or immaterial anatomical entities.                                            | <a href="http://purl.obolibrary.org/obo/HAO_0000146">http://purl.obolibrary.org/obo/HAO_0000146</a> |
|                                                                                                                                                                                                                                                                        | articulation                            | The anatomical cluster that is composed of two adjacent articular surfaces.                                                                         | <a href="http://purl.obolibrary.org/obo/HAO_0000151">http://purl.obolibrary.org/obo/HAO_0000151</a> |
| axc                                                                                                                                                                                                                                                                    | axillular carina                        | The axillular line that is a carina.                                                                                                                | <a href="http://purl.obolibrary.org/obo/HAO_0000161">http://purl.obolibrary.org/obo/HAO_0000161</a> |
|                                                                                                                                                                                                                                                                        | body                                    | The anatomical cluster that is composed of the whole organism but which excludes the antennae, legs and wings.                                      | <a href="http://purl.obolibrary.org/obo/HAO_0000182">http://purl.obolibrary.org/obo/HAO_0000182</a> |
|                                                                                                                                                                                                                                                                        | body length                             | The anatomical line between the anteriormost point of the cranium and the posteriormost point of the metasoma.                                      | <a href="http://purl.obolibrary.org/obo/HAO_0002413">http://purl.obolibrary.org/obo/HAO_0002413</a> |
|                                                                                                                                                                                                                                                                        | carina                                  | The process that is elongate and external.                                                                                                          | <a href="http://purl.obolibrary.org/obo/HAO_0000188">http://purl.obolibrary.org/obo/HAO_0000188</a> |
|                                                                                                                                                                                                                                                                        | clypeal carina                          | The carina that is longitudinal and is located on the clypeus.                                                                                      | <a href="http://purl.obolibrary.org/obo/HAO_0001187">http://purl.obolibrary.org/obo/HAO_0001187</a> |
|                                                                                                                                                                                                                                                                        | clypeus                                 | The area that corresponds to the site of origin of the clypeo-epipharyngeal muscle.                                                                 | <a href="http://purl.obolibrary.org/obo/HAO_0000212">http://purl.obolibrary.org/obo/HAO_0000212</a> |
|                                                                                                                                                                                                                                                                        | conjunctiva                             | The area of the cuticle that is weakly sclerotized, with thin exocuticle.                                                                           | <a href="http://purl.obolibrary.org/obo/HAO_0000221">http://purl.obolibrary.org/obo/HAO_0000221</a> |
|                                                                                                                                                                                                                                                                        | corner                                  | The projection that is located at the intersection of two or more edges.                                                                            | <a href="http://purl.obolibrary.org/obo/HAO_0000223">http://purl.obolibrary.org/obo/HAO_0000223</a> |
|                                                                                                                                                                                                                                                                        | coxa                                    | The leg segment that is connected to the body and to the trochanter via conjunctivae and muscles.                                                   | <a href="http://purl.obolibrary.org/obo/HAO_0000228">http://purl.obolibrary.org/obo/HAO_0000228</a> |
|                                                                                                                                                                                                                                                                        | cranium                                 | The sclerite that is articulated with the cervical prominence, the scapes and the mandibles.                                                        | <a href="http://purl.obolibrary.org/obo/HAO_0000234">http://purl.obolibrary.org/obo/HAO_0000234</a> |
| cup                                                                                                                                                                                                                                                                    | cupula                                  | The sclerite that is connected via conjunctiva and attached via muscles to abdominal tergum 9 and the gonostyle/volsella complex.                   | <a href="http://purl.obolibrary.org/obo/HAO_0000238">http://purl.obolibrary.org/obo/HAO_0000238</a> |
|                                                                                                                                                                                                                                                                        | cuspis                                  | The projection that is located apicolaterally on the parossiculus and is adjacent to the digitus.                                                   | <a href="http://purl.obolibrary.org/obo/HAO_0000239">http://purl.obolibrary.org/obo/HAO_0000239</a> |
|                                                                                                                                                                                                                                                                        | depression                              | The area that is external, concave, point-like and does not correspond to an apodeme.                                                               | <a href="http://purl.obolibrary.org/obo/HAO_0000241">http://purl.obolibrary.org/obo/HAO_0000241</a> |
|                                                                                                                                                                                                                                                                        | discriminal lamella                     | The ridge that is median, longitudinal and arises anteriorly from the base of the furca.                                                            | <a href="http://purl.obolibrary.org/obo/HAO_0000245">http://purl.obolibrary.org/obo/HAO_0000245</a> |
|                                                                                                                                                                                                                                                                        | distal projection of the parossiculus   | The distal projection of the volsella that corresponds to the apical parossicular seta.                                                             | <a href="http://purl.obolibrary.org/obo/HAO_0002386">http://purl.obolibrary.org/obo/HAO_0002386</a> |
|                                                                                                                                                                                                                                                                        | distal projection of the penisvalva     | The projection that is at the distal end of the penisvalva.                                                                                         | <a href="http://purl.obolibrary.org/obo/HAO_0002391">http://purl.obolibrary.org/obo/HAO_0002391</a> |
|                                                                                                                                                                                                                                                                        | dorsal apodeme of penisvalva            | The apodeme that is located proximodorsally on the aedeagus and is the site of insertion of the distodorsal gonostyle/volsella complex-penisval     | <a href="http://purl.obolibrary.org/obo/HAO_0002036">http://purl.obolibrary.org/obo/HAO_0002036</a> |
| dc                                                                                                                                                                                                                                                                     | dorsomedian conjunctiva of the gonos    | The conjunctiva that is linear and extends medially on the dorsal region of the gonostyle/volsella complex.                                         | <a href="http://purl.obolibrary.org/obo/HAO_0002040">http://purl.obolibrary.org/obo/HAO_0002040</a> |
|                                                                                                                                                                                                                                                                        | edge                                    | The margin that extends along the border of two areas that are oriented differently.                                                                | <a href="http://purl.obolibrary.org/obo/HAO_0000285">http://purl.obolibrary.org/obo/HAO_0000285</a> |
|                                                                                                                                                                                                                                                                        | epicnemial carina                       | The carina that delimits posteriorly the epicnemium.                                                                                                | <a href="http://purl.obolibrary.org/obo/HAO_0000292">http://purl.obolibrary.org/obo/HAO_0000292</a> |
|                                                                                                                                                                                                                                                                        | epicnemium                              | The scrobe that is located anteroventrally on the mesopectus and accommodates the procoxa.                                                          | <a href="http://purl.obolibrary.org/obo/HAO_0000294">http://purl.obolibrary.org/obo/HAO_0000294</a> |
|                                                                                                                                                                                                                                                                        | eye                                     | The compound organ that is composed of ommatidia.                                                                                                   | <a href="http://purl.obolibrary.org/obo/HAO_0000217">http://purl.obolibrary.org/obo/HAO_0000217</a> |
|                                                                                                                                                                                                                                                                        | eye margin                              | The margin of the compound eye.                                                                                                                     | <a href="http://purl.obolibrary.org/obo/HAO_0000672">http://purl.obolibrary.org/obo/HAO_0000672</a> |
|                                                                                                                                                                                                                                                                        | facial apodeme                          | The apodeme that is dorsal to the intertorular line and ventral to the anterior ocellus.                                                            | <a href="http://purl.obolibrary.org/obo/HAO_0002387">http://purl.obolibrary.org/obo/HAO_0002387</a> |
|                                                                                                                                                                                                                                                                        | facial pit                              | The pit that overlaps with the facial apodeme.                                                                                                      | <a href="http://purl.obolibrary.org/obo/HAO_0000319">http://purl.obolibrary.org/obo/HAO_0000319</a> |
|                                                                                                                                                                                                                                                                        | facial process                          | The process that is located on the upper face dorsal to the intertorular carina and corresponds internally to a conical apodeme and not the tentori | <a href="http://purl.obolibrary.org/obo/HAO_0002384">http://purl.obolibrary.org/obo/HAO_0002384</a> |

|     |                                     |                                                                                                                                                     |                                                                                                     |
|-----|-------------------------------------|-----------------------------------------------------------------------------------------------------------------------------------------------------|-----------------------------------------------------------------------------------------------------|
|     | first flagellomere                  | The flagellomere that is proximally attached to the pedicel.                                                                                        | <a href="http://purl.obolibrary.org/obo/HAO_0001148">http://purl.obolibrary.org/obo/HAO_0001148</a> |
|     | flagellomere                        | The annulus that is located distally of the pedicel.                                                                                                | <a href="http://purl.obolibrary.org/obo/HAO_0000342">http://purl.obolibrary.org/obo/HAO_0000342</a> |
|     | flagellum                           | The anatomical cluster composed of flagellomeres.                                                                                                   | <a href="http://purl.obolibrary.org/obo/HAO_0000343">http://purl.obolibrary.org/obo/HAO_0000343</a> |
|     | flange                              | The projection that is lamella-like and is located on a rim, carina, apodeme or edge.                                                               | <a href="http://purl.obolibrary.org/obo/HAO_0000344">http://purl.obolibrary.org/obo/HAO_0000344</a> |
|     | fore leg                            | The leg that is located on the prothorax.                                                                                                           | <a href="http://purl.obolibrary.org/obo/HAO_0000349">http://purl.obolibrary.org/obo/HAO_0000349</a> |
|     | fourth flagellomere                 | The flagellomere that is located immediately distal to the third flagellomere.                                                                      | <a href="http://purl.obolibrary.org/obo/HAO_0001896">http://purl.obolibrary.org/obo/HAO_0001896</a> |
|     | frons                               | The area that is between the epistomal line and the anterior ocellus and limited laterally by the inner margin of compound eye.                     | <a href="http://purl.obolibrary.org/obo/HAO_0001523">http://purl.obolibrary.org/obo/HAO_0001523</a> |
|     | gonoforceps                         | The sclerite that is located distally of the cupula and dorsolaterally of the volsella, surrounds the aedeagus dorsolaterally and does not connecte | <a href="http://purl.obolibrary.org/obo/HAO_0000381">http://purl.obolibrary.org/obo/HAO_0000381</a> |
|     | gonossicula muscle                  | The male genitalia muscle that inserts on the gonossiculus.                                                                                         | <a href="http://purl.obolibrary.org/obo/HAO_0002045">http://purl.obolibrary.org/obo/HAO_0002045</a> |
| gs  | gonostipes                          | The sclerite that is located dorsolaterally on the gonostyle/volsella complex, is connected to the distal margin of the cupula, to the proximal mar | <a href="http://purl.obolibrary.org/obo/HAO_0000386">http://purl.obolibrary.org/obo/HAO_0000386</a> |
| gvs | gonostyle-volsella complex          | The anatomical cluster that is composed of the sclerites that are located distally of the cupula and surround the aedeagus.                         | <a href="http://purl.obolibrary.org/obo/HAO_0002033">http://purl.obolibrary.org/obo/HAO_0002033</a> |
| hrp | harpe                               | The sclerite that is located distally on the gonostyle/volsella complex and does not connected to the cupula and to the volsella by conjunctiva or  | <a href="http://purl.obolibrary.org/obo/HAO_0000395">http://purl.obolibrary.org/obo/HAO_0000395</a> |
|     | harpe length                        | The anatomical line between the distalmost point of the gonostyle volsella complex and the distalmost point of the harpe in lateral view.           | <a href="http://purl.obolibrary.org/obo/HAO_0002409">http://purl.obolibrary.org/obo/HAO_0002409</a> |
|     | harpe width                         | The width of the harpe in lateral view.                                                                                                             | <a href="http://purl.obolibrary.org/obo/HAO_0002406">http://purl.obolibrary.org/obo/HAO_0002406</a> |
|     | head                                | The tagma that is located anterior to the thorax.                                                                                                   | <a href="http://purl.obolibrary.org/obo/HAO_0000397">http://purl.obolibrary.org/obo/HAO_0000397</a> |
|     | head width                          | The anatomical line that is the longest horizontal diameter of the cranium in frontal view.                                                         | <a href="http://purl.obolibrary.org/obo/HAO_0002268">http://purl.obolibrary.org/obo/HAO_0002268</a> |
|     | hind leg                            | The leg that is located on the metathorax.                                                                                                          | <a href="http://purl.obolibrary.org/obo/HAO_0000399">http://purl.obolibrary.org/obo/HAO_0000399</a> |
|     | hyperoccipital carina               | The carina that extends on the vertex between the outer orbits.                                                                                     | <a href="http://purl.obolibrary.org/obo/HAO_0000406">http://purl.obolibrary.org/obo/HAO_0000406</a> |
|     | inflection                          | The anatomical cluster that is composed of a ridge that extends along the margin of a sclerite and the marginal area of the sclerite delimited fro  | <a href="http://purl.obolibrary.org/obo/HAO_0000418">http://purl.obolibrary.org/obo/HAO_0000418</a> |
|     | interorbital space                  | The interocular distance that is the shortest between the inner margin of compound eyes.                                                            | <a href="http://purl.obolibrary.org/obo/HAO_0000432">http://purl.obolibrary.org/obo/HAO_0000432</a> |
| ita | intertorular area                   | The median area of the face between the dorsal (posterior) margin of the clypeus and the intertorular carina.                                       | <a href="http://purl.obolibrary.org/obo/HAO_0002383">http://purl.obolibrary.org/obo/HAO_0002383</a> |
|     | intertorular carina                 | The carina that extends between the dorsal margin of the antennal rims.                                                                             | <a href="http://purl.obolibrary.org/obo/HAO_0000439">http://purl.obolibrary.org/obo/HAO_0000439</a> |
|     | labial palp                         | The anatomical structure that is distal to the proximal margin of the first sclerite of the labial palp.                                            | <a href="http://purl.obolibrary.org/obo/HAO_0000450">http://purl.obolibrary.org/obo/HAO_0000450</a> |
|     | lateral ocellar line                | The anatomical line that is the shortest between the margins of the median and lateral ocelli.                                                      | <a href="http://purl.obolibrary.org/obo/HAO_0000480">http://purl.obolibrary.org/obo/HAO_0000480</a> |
|     | lateral ocellus                     | The ocellus that is paired.                                                                                                                         | <a href="http://purl.obolibrary.org/obo/HAO_0000481">http://purl.obolibrary.org/obo/HAO_0000481</a> |
|     | lateral propodeal carina            | The carina that is oblique and arises submedially from the anterior margin of the metapectal-propodeal complex and extends to the posterior pr      | <a href="http://purl.obolibrary.org/obo/HAO_0000486">http://purl.obolibrary.org/obo/HAO_0000486</a> |
|     | leg                                 | The appendage that is composed of the coxa and all distal leg segments and is connected to the pectus.                                              | <a href="http://purl.obolibrary.org/obo/HAO_0000494">http://purl.obolibrary.org/obo/HAO_0000494</a> |
|     | line                                | The anatomical structure that is linear.                                                                                                            | <a href="http://purl.obolibrary.org/obo/HAO_0001586">http://purl.obolibrary.org/obo/HAO_0001586</a> |
|     | mandible                            | The appendage that is encircled by one sclerite that is connected to the cranium proximolaterally and to the maxillo-labial complex proximome       | <a href="http://purl.obolibrary.org/obo/HAO_0000506">http://purl.obolibrary.org/obo/HAO_0000506</a> |
|     | margin                              | The line that delimits the periphery of an area.                                                                                                    | <a href="http://purl.obolibrary.org/obo/HAO_0000510">http://purl.obolibrary.org/obo/HAO_0000510</a> |
|     | maxillary palp                      | The anatomical structure that is distal to the proximal margin of the first sclerite of the maxillary palp.                                         | <a href="http://purl.obolibrary.org/obo/HAO_0000515">http://purl.obolibrary.org/obo/HAO_0000515</a> |
|     | median facial keel                  | The carina whose dorsal (posterior) region overlaps the facial pit.                                                                                 | <a href="http://purl.obolibrary.org/obo/HAO_0002388">http://purl.obolibrary.org/obo/HAO_0002388</a> |
| mfc | median flange of occipital carina   | The flange that is median and on the occipital carina.                                                                                              | <a href="http://purl.obolibrary.org/obo/HAO_0002389">http://purl.obolibrary.org/obo/HAO_0002389</a> |
| mml | median mesoscutal sulcus            | The sulcus that is a median mesoscutal line and that is adjacent to the (internal) median mesoscutal ridge.                                         | <a href="http://purl.obolibrary.org/obo/HAO_0000523">http://purl.obolibrary.org/obo/HAO_0000523</a> |
|     | median gonostyle/volsella complex-v | The gonostyle/volsella complex-volsella muscle that arises medially of the submedian conjunctiva on the distoventral margin of gonostyle/vol        | <a href="http://purl.obolibrary.org/obo/HAO_0000473">http://purl.obolibrary.org/obo/HAO_0000473</a> |
|     | mesofurcal muscle                   | The thoracic muscle that inserts on the mesofurca.                                                                                                  | <a href="http://purl.obolibrary.org/obo/HAO_0001787">http://purl.obolibrary.org/obo/HAO_0001787</a> |
|     | mesometapleural sulcus              | The sulcus that crosses the mesometapleuron from the posterolateral margin of the mesocoxal foramen to the mesopleural pit.                         | <a href="http://purl.obolibrary.org/obo/HAO_0000553">http://purl.obolibrary.org/obo/HAO_0000553</a> |
|     | mesopectus                          | The sclerite that is U-shaped in cross section, connected anteriorly with the pronotum and the propectus, dorsally with the basalare, the meso      | <a href="http://purl.obolibrary.org/obo/HAO_0000557">http://purl.obolibrary.org/obo/HAO_0000557</a> |
|     | mesopleuron                         | The lateral (vertical) area that is anterior to the mesometapleural sulcus and posterior to the pronotum.                                           | <a href="http://purl.obolibrary.org/obo/HAO_0002363">http://purl.obolibrary.org/obo/HAO_0002363</a> |
|     | mesopleuron length                  | The anatomical line that extends between the lateral end of the epinenial carina and the postpectal carina and is parallel to the lateroventral m   | <a href="http://purl.obolibrary.org/obo/HAO_0002403">http://purl.obolibrary.org/obo/HAO_0002403</a> |
|     | mesoscutellar-axillar complex       | The area that is located posteriorly of the transscutal line and is composed of the axillae and the mesoscutellum.                                  | <a href="http://purl.obolibrary.org/obo/HAO_0000572">http://purl.obolibrary.org/obo/HAO_0000572</a> |
|     | mesoscutellum                       | The scutellum that is located on the mesonotum.                                                                                                     | <a href="http://purl.obolibrary.org/obo/HAO_0000574">http://purl.obolibrary.org/obo/HAO_0000574</a> |
|     | mesoscutum                          | The area that is located anterior to the transscutal articulation.                                                                                  | <a href="http://purl.obolibrary.org/obo/HAO_0001490">http://purl.obolibrary.org/obo/HAO_0001490</a> |
|     | mesosoma                            | The anatomical cluster that is composed of the prothorax, mesothorax and the metapectal-propodeal complex.                                          | <a href="http://purl.obolibrary.org/obo/HAO_0000576">http://purl.obolibrary.org/obo/HAO_0000576</a> |
|     | mesotibia                           | The tibia that is located on the mid leg.                                                                                                           | <a href="http://purl.obolibrary.org/obo/HAO_0001351">http://purl.obolibrary.org/obo/HAO_0001351</a> |
|     | metacoxa                            | The coxa that is located on the hind leg.                                                                                                           | <a href="http://purl.obolibrary.org/obo/HAO_0000587">http://purl.obolibrary.org/obo/HAO_0000587</a> |

|        |                                        |                                                                                                                                                   |                                                                                                     |
|--------|----------------------------------------|---------------------------------------------------------------------------------------------------------------------------------------------------|-----------------------------------------------------------------------------------------------------|
|        | metafemur                              | The femur that is located on the hind leg.                                                                                                        | <a href="http://purl.obolibrary.org/obo/HAO_0001140">http://purl.obolibrary.org/obo/HAO_0001140</a> |
|        | metanotum                              | The alinotum that is located in the metathorax, is connected with the mesoscutellum and the mesopostnotum anteriorly and the acrotergite of th    | <a href="http://purl.obolibrary.org/obo/HAO_0000603">http://purl.obolibrary.org/obo/HAO_0000603</a> |
|        | metapleural carina                     | The carina that delimits the metapleuron dorsally from the propodeum, extends from just ventral of the metapleural arm to the metacoxal articu    | <a href="http://purl.obolibrary.org/obo/HAO_0000609">http://purl.obolibrary.org/obo/HAO_0000609</a> |
|        | metapleural pit                        | The pleural pit that is corresponds to the metapleural apodeme.                                                                                   | <a href="http://purl.obolibrary.org/obo/HAO_0000612">http://purl.obolibrary.org/obo/HAO_0000612</a> |
|        | metapleuron                            | The lateral (vertical) area that is posterior to the mesometapleural sulcus and anterior to the metapleural carina.                               | <a href="http://purl.obolibrary.org/obo/HAO_0002360">http://purl.obolibrary.org/obo/HAO_0002360</a> |
|        | metasoma                               | The tagma that is connected anteriorly to the metapectal-propodeal complex at the propodeal foramen and consists of abdominal segments.           | <a href="http://purl.obolibrary.org/obo/HAO_0000626">http://purl.obolibrary.org/obo/HAO_0000626</a> |
|        | metathorax                             | The thoracic segment that is located between the mesothorax and the first abdominal tergum and is delimited by the metanotum and the metape       | <a href="http://purl.obolibrary.org/obo/HAO_0000630">http://purl.obolibrary.org/obo/HAO_0000630</a> |
|        | mouthparts                             | The anatomical cluster that is composed of the labrum, epipharyngeal wall, hypopharyngeal wall (including the sitophore), mandibles, maxillae     | <a href="http://purl.obolibrary.org/obo/HAO_0000639">http://purl.obolibrary.org/obo/HAO_0000639</a> |
|        | muscle                                 | The portion of tissue that is composed of contractile fibers.                                                                                     | <a href="http://purl.obolibrary.org/obo/HAO_0000641">http://purl.obolibrary.org/obo/HAO_0000641</a> |
|        | ninth flagellomere                     | The flagellomere that is located immediately distal to the eighth flagellomere.                                                                   | <a href="http://purl.obolibrary.org/obo/HAO_0001900">http://purl.obolibrary.org/obo/HAO_0001900</a> |
|        | notaulus                               | The line that extends submedially along the mesoscutum and corresponds to the median border of the site of origin of the first mesopleuro-mes     | <a href="http://purl.obolibrary.org/obo/HAO_0000647">http://purl.obolibrary.org/obo/HAO_0000647</a> |
|        | notch                                  | The part of the margin of a sclerite that is concave.                                                                                             | <a href="http://purl.obolibrary.org/obo/HAO_0000648">http://purl.obolibrary.org/obo/HAO_0000648</a> |
|        | occipital carina                       | The carina that surrounds dorsolaterally the occiput.                                                                                             | <a href="http://purl.obolibrary.org/obo/HAO_0000653">http://purl.obolibrary.org/obo/HAO_0000653</a> |
|        | ocellar triangle                       | The area that is limited posteriorly by the posterior ocellar line and laterally by the lateral ocellar line.                                     | <a href="http://purl.obolibrary.org/obo/HAO_0000430">http://purl.obolibrary.org/obo/HAO_0000430</a> |
|        | ocellus                                | The multi-tissue structure that is located on the top of the head, composed of the corneal lens, pigment cell, rhabdoms and synaptic plexus.      | <a href="http://purl.obolibrary.org/obo/HAO_0000661">http://purl.obolibrary.org/obo/HAO_0000661</a> |
|        | ocular ocellar line                    | The anatomical line that is shortest and connects the compound eye and the lateral ocellus.                                                       | <a href="http://purl.obolibrary.org/obo/HAO_0000662">http://purl.obolibrary.org/obo/HAO_0000662</a> |
|        | palp                                   | The anatomical cluster that is composed of the palpal segments.                                                                                   | <a href="http://purl.obolibrary.org/obo/HAO_0000683">http://purl.obolibrary.org/obo/HAO_0000683</a> |
| pss    | parossiculus                           | The sclerite that is connected via conjunctiva distomedially to the gonostipes, and articulates with the gonossiculus.                            | <a href="http://purl.obolibrary.org/obo/HAO_0000703">http://purl.obolibrary.org/obo/HAO_0000703</a> |
|        | patch                                  | The area that is round and differs from surrounding regions in sculpture, setae, and/or pigmentation.                                             | <a href="http://purl.obolibrary.org/obo/HAO_0000704">http://purl.obolibrary.org/obo/HAO_0000704</a> |
|        | pedicel                                | The antennal segment that is connected proximally to the scape and distally to the flagellum.                                                     | <a href="http://purl.obolibrary.org/obo/HAO_0000706">http://purl.obolibrary.org/obo/HAO_0000706</a> |
|        | penisvalva                             | The sclerite that is in the middle of the external male genitalia, surrounds the distal part of the ductus ejaculatorius and the endophallus.     | <a href="http://purl.obolibrary.org/obo/HAO_0000707">http://purl.obolibrary.org/obo/HAO_0000707</a> |
|        | penisvalval muscle                     | The male genitalia muscle that inserts on the penisvalva.                                                                                         | <a href="http://purl.obolibrary.org/obo/HAO_0002051">http://purl.obolibrary.org/obo/HAO_0002051</a> |
|        | penisvalvo-gonossicula muscle          | The gonossicula muscle that arises from the penisvalva.                                                                                           | <a href="http://purl.obolibrary.org/obo/HAO_0000709">http://purl.obolibrary.org/obo/HAO_0000709</a> |
|        | petiole neck                           | The anterior area of the petiole that is narrower than the posterior region in dorsal view.                                                       | <a href="http://purl.obolibrary.org/obo/HAO_0002411">http://purl.obolibrary.org/obo/HAO_0002411</a> |
|        | pharynx                                | The anatomical space that is located proximal to the cibarium.                                                                                    | <a href="http://purl.obolibrary.org/obo/HAO_0001740">http://purl.obolibrary.org/obo/HAO_0001740</a> |
|        | pleural pit                            | The pit that is located on the pleuron and corresponds to the pleural apophysis.                                                                  | <a href="http://purl.obolibrary.org/obo/HAO_0000723">http://purl.obolibrary.org/obo/HAO_0000723</a> |
|        | pleural pit line                       | The anatomical line between the mesopleural and metapleural pits.                                                                                 | <a href="http://purl.obolibrary.org/obo/HAO_0002374">http://purl.obolibrary.org/obo/HAO_0002374</a> |
|        | posterior ocellar line                 | The anatomical line that is the shortest between the margin of the lateral ocelli.                                                                | <a href="http://purl.obolibrary.org/obo/HAO_0000759">http://purl.obolibrary.org/obo/HAO_0000759</a> |
|        | postoccipital carina                   | The rim that surrounds the occipital foramen.                                                                                                     | <a href="http://purl.obolibrary.org/obo/HAO_0001810">http://purl.obolibrary.org/obo/HAO_0001810</a> |
| pcc    | postocellar carina                     | The carina that connects the posterior margins of the left and right lateral ocellar fovea.                                                       | <a href="http://purl.obolibrary.org/obo/HAO_0002385">http://purl.obolibrary.org/obo/HAO_0002385</a> |
| poc    | preoccipital carina                    | The carina that is transverse and extends posteriorly of the lateral ocelli and compound eye and delimits anteriorly the preoccipital lunula.     | <a href="http://purl.obolibrary.org/obo/HAO_0000805">http://purl.obolibrary.org/obo/HAO_0000805</a> |
| pos    | preoccipital furrow                    | The sulcus that arises medially from the anterior margin of the occipital carina and extends towards the anterior ocellus.                        | <a href="http://purl.obolibrary.org/obo/HAO_0000806">http://purl.obolibrary.org/obo/HAO_0000806</a> |
|        | preoccipital lunula                    | The area that is concave, is located on the vertex and is limited anteriorly by the preoccipital carina and posteriorly by the occipital carina.  | <a href="http://purl.obolibrary.org/obo/HAO_0000807">http://purl.obolibrary.org/obo/HAO_0000807</a> |
|        | process                                | The area on the sclerite that is raised.                                                                                                          | <a href="http://purl.obolibrary.org/obo/HAO_0000822">http://purl.obolibrary.org/obo/HAO_0000822</a> |
|        | projection                             | The process that is located on an edge.                                                                                                           | <a href="http://purl.obolibrary.org/obo/HAO_0000829">http://purl.obolibrary.org/obo/HAO_0000829</a> |
|        | pronotum                               | The notum that is located in the prothorax.                                                                                                       | <a href="http://purl.obolibrary.org/obo/HAO_0000853">http://purl.obolibrary.org/obo/HAO_0000853</a> |
|        | propodeal carina                       | The carina that is located on the propodeum.                                                                                                      | <a href="http://purl.obolibrary.org/obo/HAO_0000864">http://purl.obolibrary.org/obo/HAO_0000864</a> |
|        | propodeum                              | The area of the metapectal-propodeal complex that is located posterior to the metapleural carina.                                                 | <a href="http://purl.obolibrary.org/obo/HAO_0001249">http://purl.obolibrary.org/obo/HAO_0001249</a> |
|        | The anatomical line that connects the  | The area that is located dorsomedially on the metapectal-propodeal complex.                                                                       | <a href="http://purl.obolibrary.org/obo/HAO_0001994">http://purl.obolibrary.org/obo/HAO_0001994</a> |
|        | protibia                               | The tibia that is located on the fore leg.                                                                                                        | <a href="http://purl.obolibrary.org/obo/HAO_0000350">http://purl.obolibrary.org/obo/HAO_0000350</a> |
| gs-hrp | proximal gonostyle/volsella co         | The gonostyle/volsella complex-harpal muscle that inserts on the median wall of the harpe and arises proximally of the                            | <a href="http://purl.obolibrary.org/obo/HAO_0000926">http://purl.obolibrary.org/obo/HAO_0000926</a> |
| pdc    | proximodorsal notch of cupula          | The notch that is medially on the proximodorsal margin of the cupula and is delimited laterally by the site of origins of the dorsomedial cupulo- | <a href="http://purl.obolibrary.org/obo/HAO_0002048">http://purl.obolibrary.org/obo/HAO_0002048</a> |
| ppc    | proximolateral projection of the cupul | The projection that is between the proximodorsal notch of cupula and the proximoventral notch of the cupula.                                      | <a href="http://purl.obolibrary.org/obo/HAO_0002394">http://purl.obolibrary.org/obo/HAO_0002394</a> |
|        | region                                 | The anatomical structure that is delimited by at least one immaterial anatomical entity.                                                          | <a href="http://purl.obolibrary.org/obo/HAO_0000893">http://purl.obolibrary.org/obo/HAO_0000893</a> |
|        | ridge                                  | The apodeme that is elongate.                                                                                                                     | <a href="http://purl.obolibrary.org/obo/HAO_0000899">http://purl.obolibrary.org/obo/HAO_0000899</a> |
|        | rim                                    | The carina that extends along the margin or edge of a sclerite.                                                                                   | <a href="http://purl.obolibrary.org/obo/HAO_0000900">http://purl.obolibrary.org/obo/HAO_0000900</a> |

|     |                                          |                                                                                                                                                      |                                                                                                     |
|-----|------------------------------------------|------------------------------------------------------------------------------------------------------------------------------------------------------|-----------------------------------------------------------------------------------------------------|
|     | row                                      | The anatomical cluster that is composed of repeated units of anatomical structures.                                                                  | <a href="http://purl.obolibrary.org/obo/HAO_0000901">http://purl.obolibrary.org/obo/HAO_0000901</a> |
|     | row of setae                             | The row that is composed of setae.                                                                                                                   | <a href="http://purl.obolibrary.org/obo/HAO_0000903">http://purl.obolibrary.org/obo/HAO_0000903</a> |
|     | scape                                    | The antennal segment that is proximal to the pedicel and is connected to the head via the radicle.                                                   | <a href="http://purl.obolibrary.org/obo/HAO_0000908">http://purl.obolibrary.org/obo/HAO_0000908</a> |
|     | scrobe                                   | The area that is impressed and is for the reception or concealment of another sclerite.                                                              | <a href="http://purl.obolibrary.org/obo/HAO_0000912">http://purl.obolibrary.org/obo/HAO_0000912</a> |
|     | sculpture                                | The area that is located on the sclerite and that is composed of repetitive anatomical structures.                                                   | <a href="http://purl.obolibrary.org/obo/HAO_0000913">http://purl.obolibrary.org/obo/HAO_0000913</a> |
|     | scutoscutellar sulcus                    | The sulcus that extends along the scutoscutellar suture.                                                                                             | <a href="http://purl.obolibrary.org/obo/HAO_0000919">http://purl.obolibrary.org/obo/HAO_0000919</a> |
|     | sensillar patch                          | The patch that differs from surrounding region by presence of sensilla.                                                                              | <a href="http://purl.obolibrary.org/obo/HAO_0000931">http://purl.obolibrary.org/obo/HAO_0000931</a> |
|     | sensillar patch of the male flagellomere | The sensillar patch that is located on the ventral surface of the male flagellomere.                                                                 | <a href="http://purl.obolibrary.org/obo/HAO_0000932">http://purl.obolibrary.org/obo/HAO_0000932</a> |
|     | sensillar ring of harpe                  | The row of setae on the distomedial harpal wall that is parallel to the harpal margin.                                                               | <a href="http://purl.obolibrary.org/obo/HAO_0002392">http://purl.obolibrary.org/obo/HAO_0002392</a> |
|     | seta                                     | The sensillum with a hair-like cuticular component.                                                                                                  | <a href="http://purl.obolibrary.org/obo/HAO_0002299">http://purl.obolibrary.org/obo/HAO_0002299</a> |
|     | setal pit                                | The impression with a centered seta.                                                                                                                 | <a href="http://purl.obolibrary.org/obo/HAO_0001958">http://purl.obolibrary.org/obo/HAO_0001958</a> |
|     | setiferous patch                         | The patch that differs from the surrounding region by having denser setae.                                                                           | <a href="http://purl.obolibrary.org/obo/HAO_0000936">http://purl.obolibrary.org/obo/HAO_0000936</a> |
|     | speculum                                 | The area that is located dorsally on the mesopleuron, is delimited posteriorly by the mesepimeral ridge and corresponds to the site of origin of t   | <a href="http://purl.obolibrary.org/obo/HAO_0000944">http://purl.obolibrary.org/obo/HAO_0000944</a> |
|     | spine                                    | The process that lacks non-sclerotised ring at the base.                                                                                             | <a href="http://purl.obolibrary.org/obo/HAO_0000949">http://purl.obolibrary.org/obo/HAO_0000949</a> |
| ste | sternaulus                               | The line that marks the site of origin of the mesopleuro-basalare and first mesopleuro-mesonotal muscle.                                             | <a href="http://purl.obolibrary.org/obo/HAO_0000953">http://purl.obolibrary.org/obo/HAO_0000953</a> |
|     | sternaulus length                        | The straight anatomical line between the anterior and posterior ends of the sternaulus.                                                              | <a href="http://purl.obolibrary.org/obo/HAO_0002402">http://purl.obolibrary.org/obo/HAO_0002402</a> |
| sfc | submedial flange of occipital carina     | The flange that is submedial and is on the occipital carina.                                                                                         | <a href="http://purl.obolibrary.org/obo/HAO_0002390">http://purl.obolibrary.org/obo/HAO_0002390</a> |
| stc | subtorular carina                        | The carina that extends ventrally from the lateral margin of the antennal rim.                                                                       | <a href="http://purl.obolibrary.org/obo/HAO_0002400">http://purl.obolibrary.org/obo/HAO_0002400</a> |
|     | sulcus                                   | The groove that corresponds to a ridge.                                                                                                              | <a href="http://purl.obolibrary.org/obo/HAO_0000978">http://purl.obolibrary.org/obo/HAO_0000978</a> |
|     | supraclypeal depression                  | The median impression on the frons that is dorsal to the intertorular carina and is not a scrobe for receiving the scape.                            | <a href="http://purl.obolibrary.org/obo/HAO_0002380">http://purl.obolibrary.org/obo/HAO_0002380</a> |
|     | tegula                                   | The sclerite that is located laterally of the preaxilla and obscures the anterior mesonoto-first axillary articulation and the mesopleuro-second axi | <a href="http://purl.obolibrary.org/obo/HAO_0000993">http://purl.obolibrary.org/obo/HAO_0000993</a> |
|     | tergum                                   | The area that is located on the integument and is dorsal of the ventral diaphragm.                                                                   | <a href="http://purl.obolibrary.org/obo/HAO_0001006">http://purl.obolibrary.org/obo/HAO_0001006</a> |
|     | tibia                                    | The leg segment that is proximal to the tarsus and distal to the femur.                                                                              | <a href="http://purl.obolibrary.org/obo/HAO_0001017">http://purl.obolibrary.org/obo/HAO_0001017</a> |
|     | tooth                                    | The projection that is located distally on the mandible.                                                                                             | <a href="http://purl.obolibrary.org/obo/HAO_0001019">http://purl.obolibrary.org/obo/HAO_0001019</a> |
|     | torulo-clypeal carina                    | The carina that connects the clypeus with the antennal rim.                                                                                          | <a href="http://purl.obolibrary.org/obo/HAO_0002399">http://purl.obolibrary.org/obo/HAO_0002399</a> |
|     | transscutal articulation                 | The sulcus that extends along the transscutal line.                                                                                                  | <a href="http://purl.obolibrary.org/obo/HAO_0001623">http://purl.obolibrary.org/obo/HAO_0001623</a> |
|     | transverse carina on petiole             | The carina that delimits the anterior vertical area of abdominal segment 2.                                                                          | <a href="http://purl.obolibrary.org/obo/HAO_0001029">http://purl.obolibrary.org/obo/HAO_0001029</a> |
| tfc | transverse frontal carina                | The transverse carina that is dorsal to the facial pit and ventral to the anterior ocellus.                                                          | <a href="http://purl.obolibrary.org/obo/HAO_0002398">http://purl.obolibrary.org/obo/HAO_0002398</a> |
|     | transverse line of the metanotum-prop    | The line of the metanoto-propodeo-metapecto-mesopectal complex that connects the humeral sclerite to the third phragma.                              | <a href="http://purl.obolibrary.org/obo/HAO_0002396">http://purl.obolibrary.org/obo/HAO_0002396</a> |
|     | upper face                               | The area that is located dorsally of the ventral margin of the antennal rim and ventrally of the anterior ocellus medial to the inner margins of the | <a href="http://purl.obolibrary.org/obo/HAO_0001044">http://purl.obolibrary.org/obo/HAO_0001044</a> |
|     | ventrolateral invagination of the pron   | The invagination that at the ventrolateral edge of the pronotum.                                                                                     | <a href="http://purl.obolibrary.org/obo/HAO_0002401">http://purl.obolibrary.org/obo/HAO_0002401</a> |
|     | ventrolateral setiferous patch           | The sublateral setiferous patch that is on the frons between the intertorular carina and the facial pit, and is separated from the median setiferous | <a href="http://purl.obolibrary.org/obo/HAO_0002382">http://purl.obolibrary.org/obo/HAO_0002382</a> |
|     | ventromedian setiferous patch            | The median setiferous patch that is on the frons between the intertorular carina and the facial pit.                                                 | <a href="http://purl.obolibrary.org/obo/HAO_0002381">http://purl.obolibrary.org/obo/HAO_0002381</a> |
|     | vertex                                   | The area that is delimited by the intersection of the margin of the compound eyes, the interorbital plane, and the anatomical line that is tangenti  | <a href="http://purl.obolibrary.org/obo/HAO_0001077">http://purl.obolibrary.org/obo/HAO_0001077</a> |
|     | volSELLa                                 | The anatomical cluster that is composed of the sclerites on the ventral part of the male genitalia that are not connected to the cupula via muscles  | <a href="http://purl.obolibrary.org/obo/HAO_0001084">http://purl.obolibrary.org/obo/HAO_0001084</a> |
|     | width                                    | The anatomical line that is perpendicular to the longitudinal axis of the anatomical structure and between one side of an object to the opposite s   | <a href="http://purl.obolibrary.org/obo/HAO_0002375">http://purl.obolibrary.org/obo/HAO_0002375</a> |
